# Supplementary material
Source: PubMed Central journal article supplement (PMC3795617)
Supplement: NIHMS283881-supplement-Supplementary_data.pdf [file NIHMS283881-supplement-Supplementary_data.pdf]

**Table 1. Oligonucleotide sequences of primers used for real-time PCR**

| Name             | Oligonucleotide Sequence                                 | Accession No. |
|------------------|----------------------------------------------------------|---------------|
| H6PDH            | F: TGGCTACGGGTTGTTTTTGAA<br>R: TATACACGGTACATCTCCTCTTCCT | BC042677      |
| G6PT             | F: AGGCCTTGTAGGAAGCATTGC<br>R: TCACCGTTACTCGGAAGAGGAA    | NM_008063     |
| 11 $\beta$ -HSD1 | F: CCTTGGCCTCATAGACACAGAAAC<br>R: GAGTCAAAGGCGATTTGTCAT  | NM_008288     |
| PEPCK            | F: TGAAGTACAGACTCGCCCTAT<br>R: GCACTTGATGAACTCCCATCT     | NM_011044     |
| G6Pase           | F: TTGCTGTGGCTGAAACTTTCAG<br>R: TCCAAGCGCGAAACCAA        | NM_008061     |

Sequences are listed 5' to 3'. F indicates forward primers; R, reverse primers.
